# Supplementary material
Source: publisher figshare collection journal article supplement (https://acs.figshare.com/ndownloader/files/4597576)
Supplement: Supplementary file 1 [file 4597576]

# Supporting Information

## Conformation Changes and Luminescent Properties of Au-Ln (Ln = Nd, Eu, Er, Yb) Arrays with 5-Ethynyl-2,2'-Bipyridine

Hai-Bing Xu,<sup>†</sup> Li-Yi Zhang,<sup>†</sup> Jun Ni,<sup>†</sup> Hsiu-Yi Chao,<sup>§</sup> and Zhong-Ning Chen<sup>\*,†,‡</sup>

*State Key Laboratory of Structural Chemistry, Fujian Institute of Research on the Structure of Matter, Chinese Academy of Sciences, Fuzhou, Fujian 350002, China, State Key Laboratory of Organometallic Chemistry, Shanghai Institute of Organic Chemistry, Chinese Academy of Sciences, Shanghai 200032, China, MOE Laboratory of Bioinorganic and Synthetic Chemistry, School of Chemistry and Chemical Engineering, Sun Yat-Sen University, Guangzhou, Guangdong 510275, China*

---

<sup>†</sup> Fujian Institute of Research on the Structure of Matter

<sup>‡</sup> Shanghai Institute of Organic Chemistry

<sup>§</sup> Sun Yat-Sen University

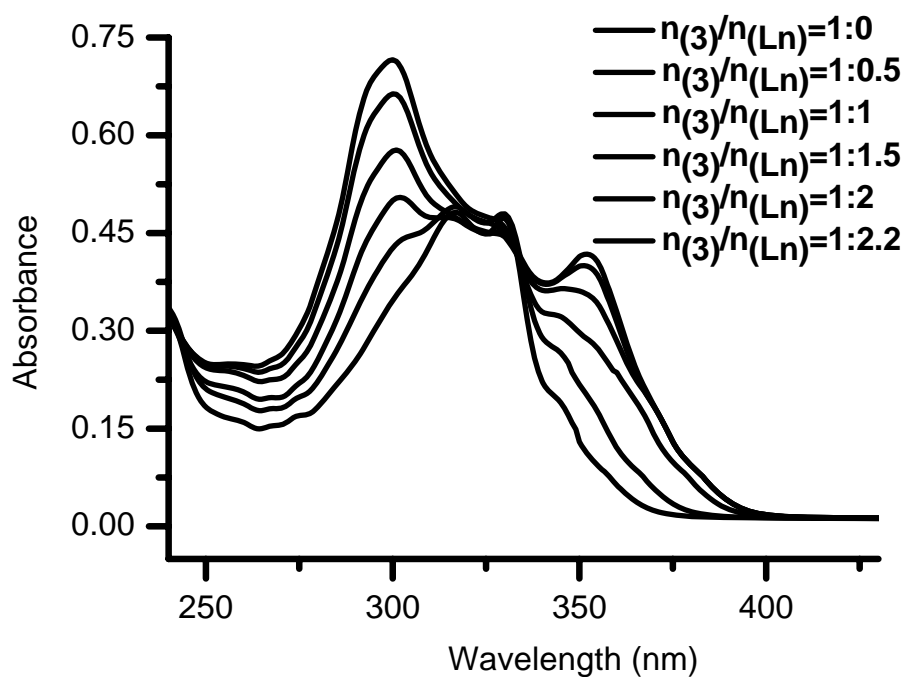

**Figure S1.** Titration of **3** with  $\text{Er}(\text{hfac})_3(\text{H}_2\text{O})_2$  in dichloromethane solution, showing a red shift absorption band from  $\text{Au}_2(\text{dppb})(\text{acetylide})_2$  chromophore.

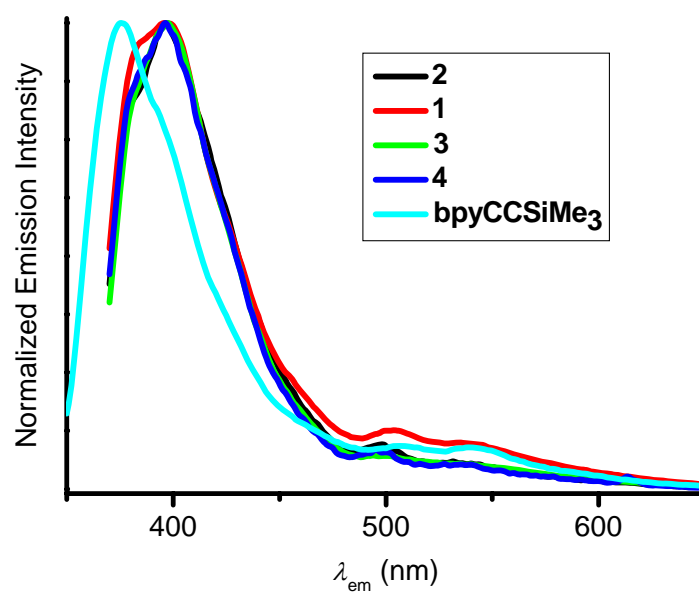

**Figure S2.** Emission spectra of **1–4** and  $\text{bpyC}\equiv\text{CSiMe}_3$  in dichloromethane at 298 K.

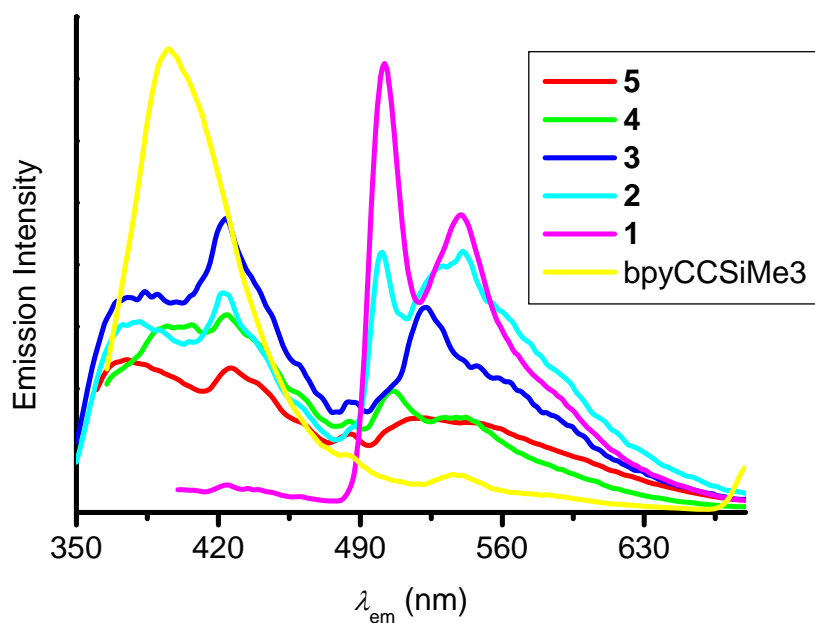

**Figure S3.** Emission spectra of **1–5** and  $\text{bpyC}\equiv\text{CSiMe}_3$  in the solid states at 77 K.

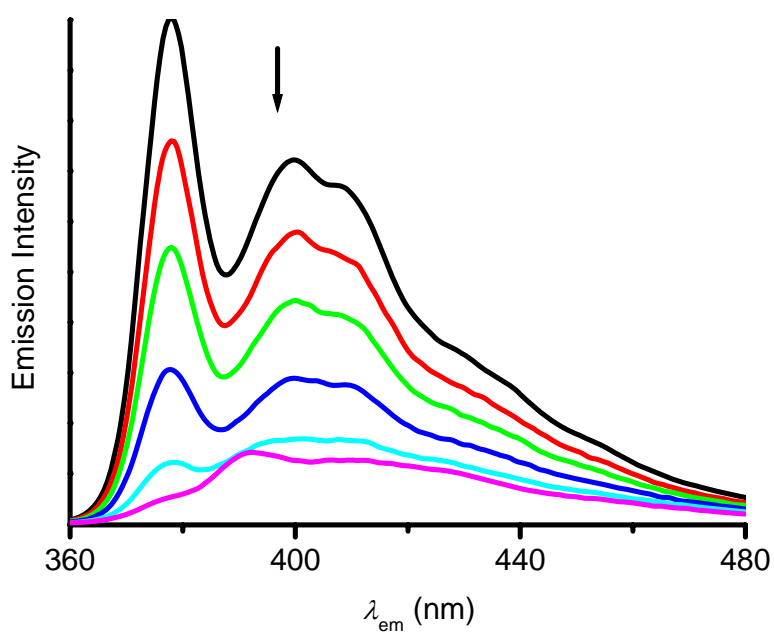

**Figure S4.** Titration of **3** with  $\text{Yb}(\text{hfac})_3(\text{H}_2\text{O})_2$  in dichloromethane solutions, showing the decreasing of  $\text{bpyC}\equiv\text{CSiMe}_3$ -centered emission from the  $^1(\pi\pi^*)$  state.
